# Supplementary material for: Assembly assay identifies a critical region of human fibrillin-1 required for 10–12 nm diameter microfibril biogenesis
Source: PubMed Central journal article supplement (PMC7971562; doi:10.1371/journal.pone.0248532), 2021-03-18
Supplement: pone.0248532.s003.pdf [file pone.0248532.s003.pdf]

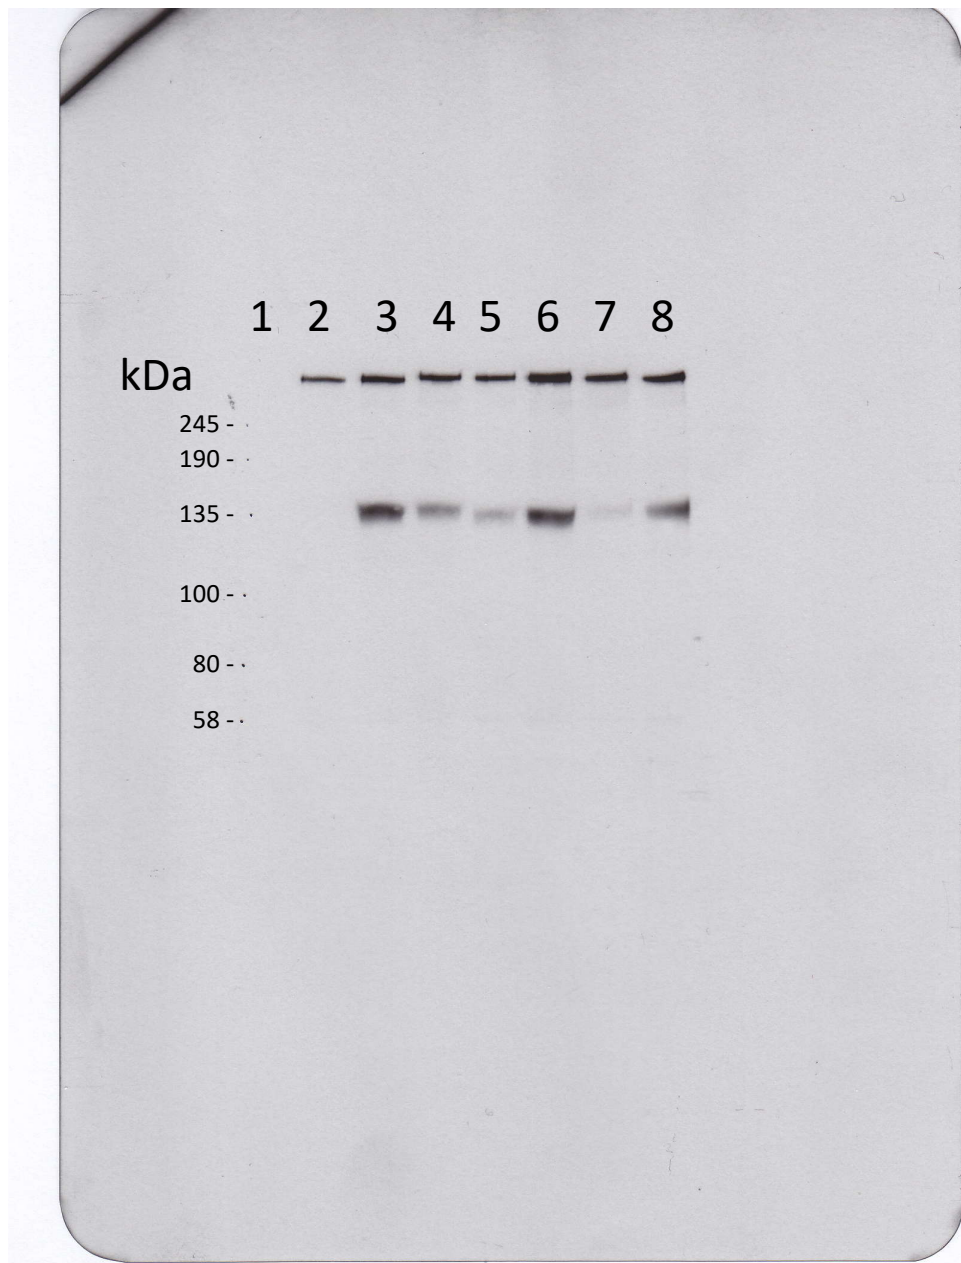

**Fig. 2, panel C, cMFS blot**

Lanes:

1. Size markers (NEB P7712)
2. untransfected MSU-1.1 control
3. WT
4. Y1101C
5. D1113G
6. D1115G
7. G1127S
8. N1382S

Image captured with a Canon desktop scanner

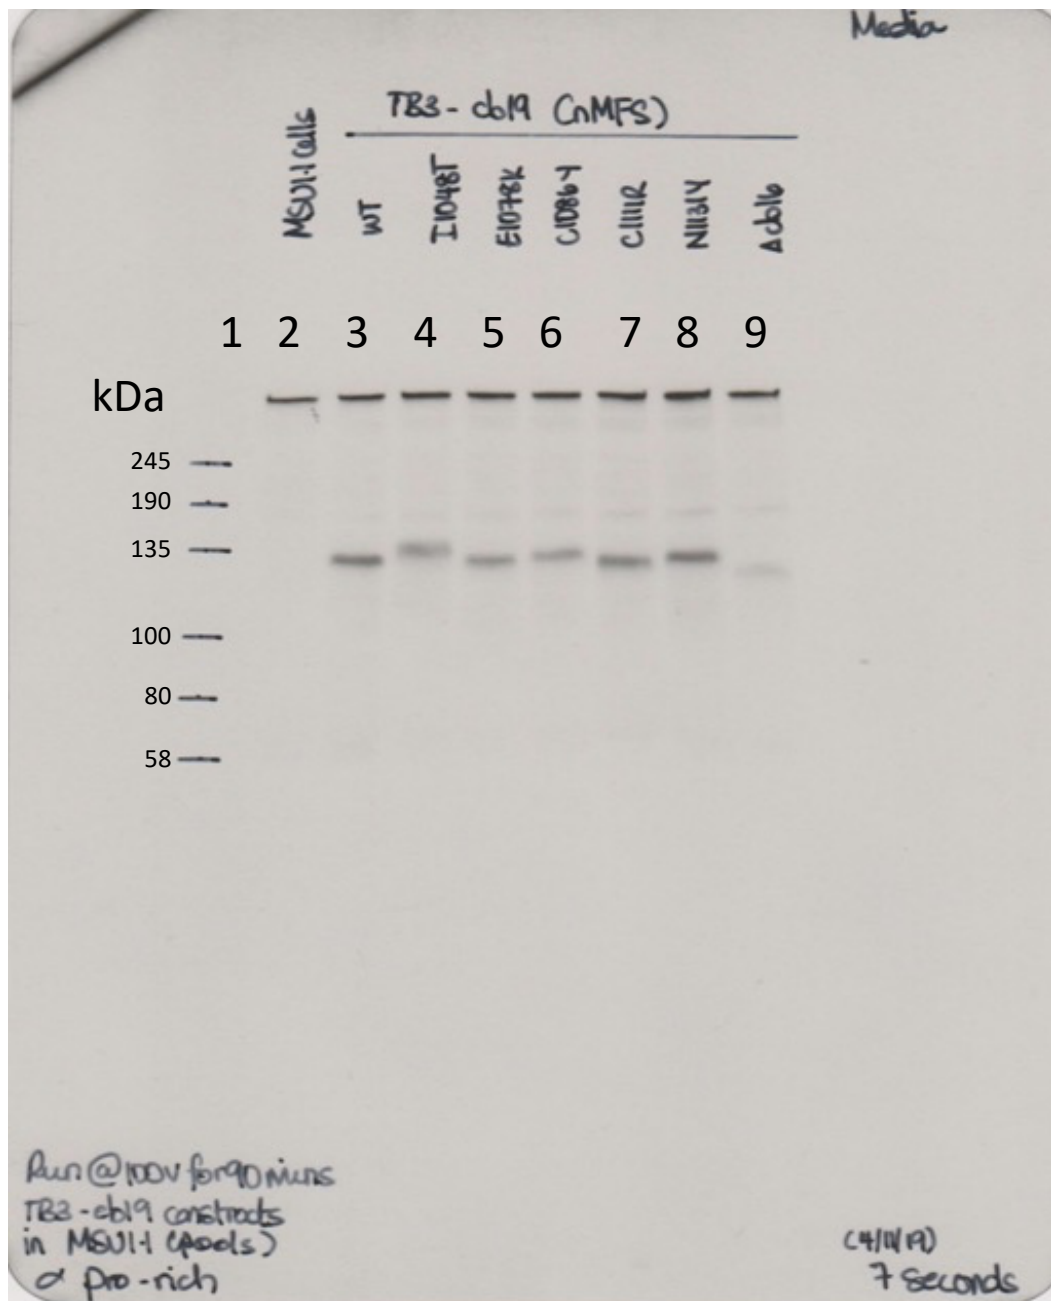

**Fig. 2, panel C, nMFS blot**

Lanes:

1. Size markers (NEB P7712)
2. untransfected MSU-1.1 control
3. WT
4. I1048T
5. E1073K (\*mislabeled as E1078K)
6. C1086Y
7. C1111R
8. N1131Y
9. ΔcbEGF16

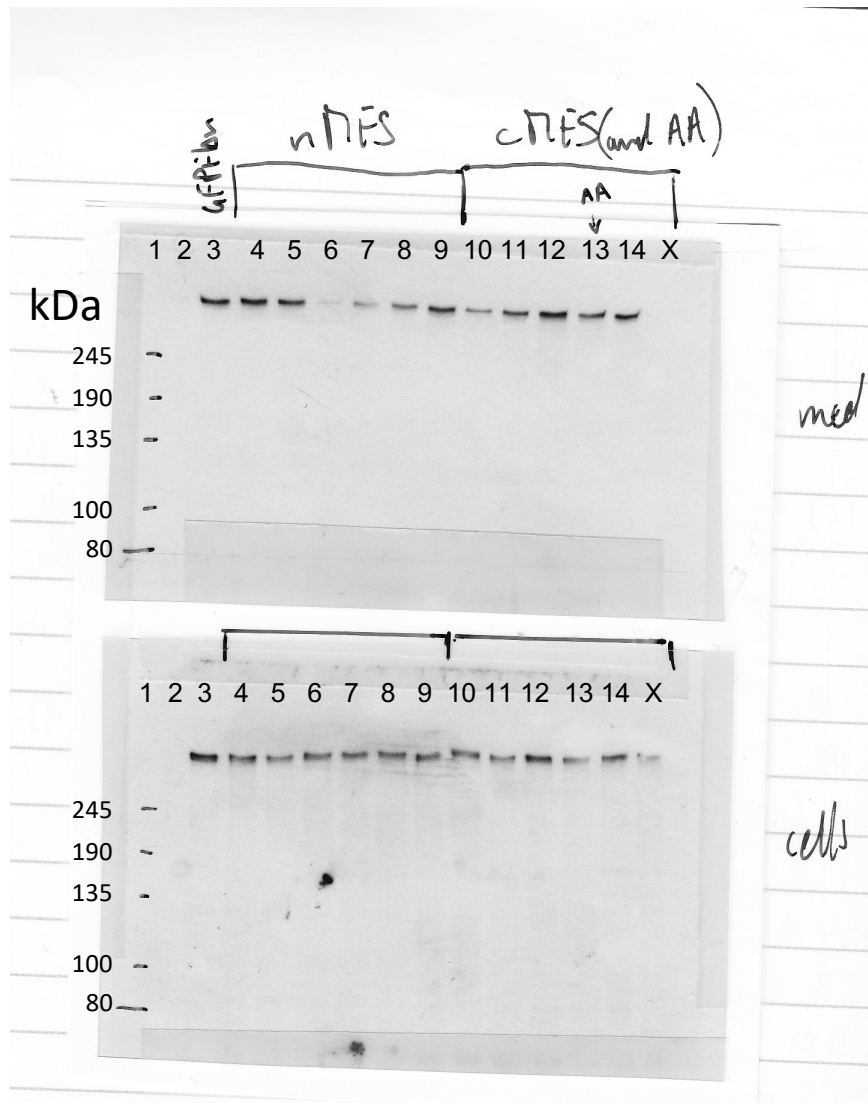

**Fig. 3 blots**

Lanes:

1. Size markers (NEB P7712)
2. pcDNA
3. GFPFbn WT
4. I1048T
5. E1073K
6. C1086y
7. C1111R
8. N1131Y
9.  $\Delta$ cbEGF16
10. Y1101C
11. D1113G
12. D1115G
13. G1127S
14. N1382S
- X. C1720Y (domain TB5 MFS mutant, not used in paper)
